# Supplementary material
Source: PubMed Central journal article supplement (PMC5990932)
Supplement: ac8b00382_si_001.pdf [file ac8b00382_si_001.pdf]

1 **SUPPORTING INFORMATION:**

2 **Capillary HILIC-MS: a new tool for sensitive top-down proteomics**

3 Andrea F.G. Gargano<sup>a,b,c\*</sup>, Liana S. Roca<sup>a,c</sup>, Ryan T. Fellers<sup>d</sup>, Max Bocxe<sup>b</sup>, Elena  
4 Domínguez-Vega<sup>b,e</sup>, Govert W. Somsen<sup>a,b</sup>

5  
6 <sup>a</sup> Center for Analytical Science Amsterdam, Science Park 904, 1098 XH Amsterdam, The Netherlands

7  
8 <sup>b</sup> Vrije Universiteit Amsterdam, Amsterdam Institute for Molecules, Medicines and Systems, de  
9 Boelelaan 1083, 1081 HV Amsterdam, The Netherlands

10  
11 <sup>c</sup> Van 't Hoff Institute for Molecular Sciences, Science Park 904 1098 XH Amsterdam, Netherlands

12 <sup>d</sup> Departments of Chemistry, Molecular Biosciences and the Proteomics Center of Excellence, 2145 N.  
13 Sheridan Road, Evanston, Illinois 60208, United States

14  
15 <sup>e</sup> Center for Proteomics and Metabolomics, Leiden University Medical Center, Postbus 9600, 2300 RC  
16 Leiden, The Netherlands

17  
18 **▪ TOC of the supporting information**

19 **Sections**

20 S.1 Retention in HILIC and RPLC vs Aliphatic Index..... 2  
21 S.2 Breakthrough in HILIC ..... 3  
22 S.3 Calibration curve for Cytochrome C and Ribonuclease on capillary HILIC ..... 4  
23 S.4 MS spectra of Figure 5..... 6  
24 S.5 HILIC- MS analysis of E.coli Lysate .....10

25  
26  
27 [\\*a.gargano@uva.nl](mailto:a.gargano@uva.nl)

28  
29 Dr. Andrea Gargano  
30 Analytical Chemistry  
31 Center for Analytical Science Amsterdam  
32 Universiteit van Amsterdam

33 Tel: +31-20-525 7040  
34 Science Park 904 |1098 XH Amsterdam  
35 Building C2, room 248A

36

## S.1 Retention in HILIC and RPLC vs Aliphatic Index

37 Here we report the linear regression between the % elution of solvent B of myoglobin,  
38 ubiquitin, cytochrome C, carbonic anhydrase, lysozyme, trypsinogen, RNase A and their  
39 theoretical aliphatic index. Further details are available in Table 1 of the manuscript.

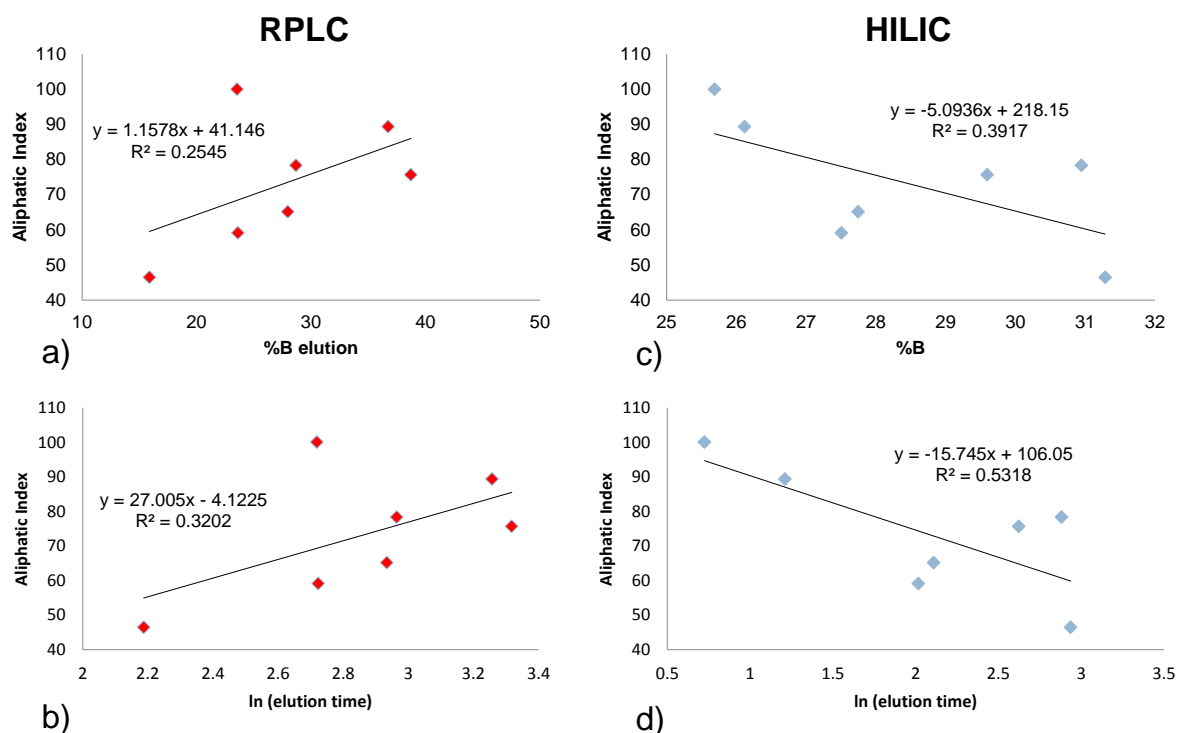

40

41 **Figure S1:** Scatter plots and linear regression of aliphatic index vs. percentage of elution  
42 solvent (a and c) and natural logarithm of the elution time (b,d) obtained during RPLC (a,b)  
43 and HILIC (C,d) for the proteins myoglobin, ubiquitin, cytochrome C, carbonic anhydrase,  
44 lysozyme, trypsinogen, RNase A).

45

46

47

## S.2 Breakthrough in HILIC

48 In Figure S2 we report the chromatograms used to calculate the protein area reported in  
49 Figure 2 of the manuscript.

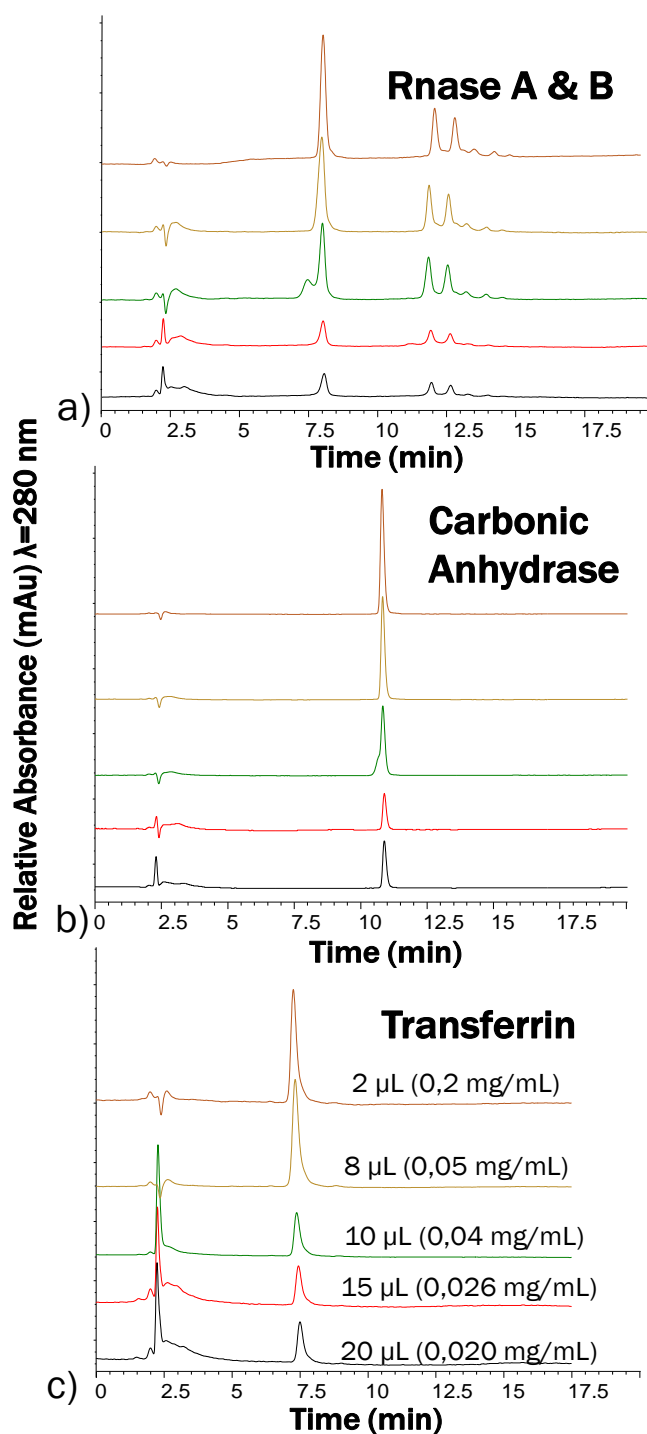

50

51 **Figure S2:** Effect of injection volume on HILIC of a) Ribonuclease A and B, b) Carbonic anhydrase,  
52 and c) Transferrin. Gradient solvents, see Figure 1. Linear gradient programming: a) and c) from 20%  
53 to 31% B in 1 min, to 45% B in 17 min, to 90% B in 1 min, 90% B for 20 min, and finally to 10% B in 1  
54 min; b) 10%, to 20% B in 1 min, to 45% B in 17 min, to 90% B in 1 min, 90% B for 20 min, and finally  
55 to 10% B in 1 min. The Y axes of the different volume injection per protein are normalized to the  
56 response of the most intense peak at 2  $\mu$ L.

57

### S.3 Calibration curve for Cytochrome C and Ribonuclease on capillary HILIC

58

59 This subchapter present peak area data (Figure S3) and MS spectra (Figure S4) obtained  
60 from the injection of different mass quantity (from 5 to 400 ng using injection volumes varying  
61 between 1 and 20  $\mu\text{L}$ ) of a mixture of cytochrome C and ribonuclease A on a capillary HILIC  
62 method. The linear regression of mass quantity versus detected area demonstrates that this  
63 method can be used for quantitative purposes.

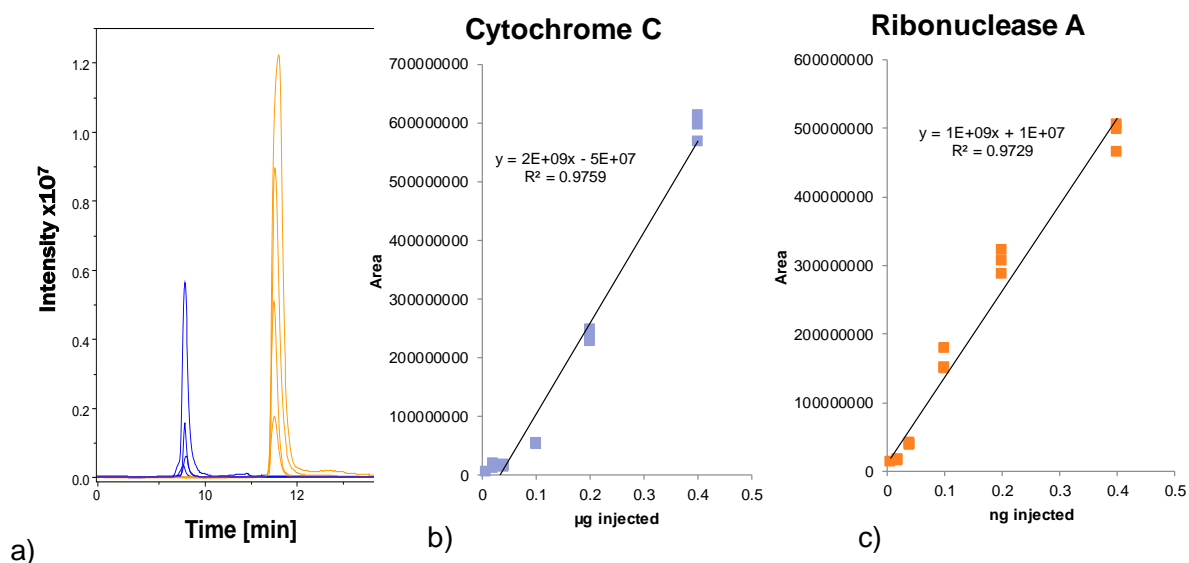

64

65 **Figure S3:** a) EICs obtained during capillary HILIC-MS of a mixture of cytochrome C (blue)  
66 and ribonuclease A (orange) after loading increasing protein mass (5-400 ng each) on the C4  
67 trap column. b) and c) calibration curves obtained for both proteins by plotting peak area  
68 from TIC (triplicate injection) vs. loaded mass.

69

70

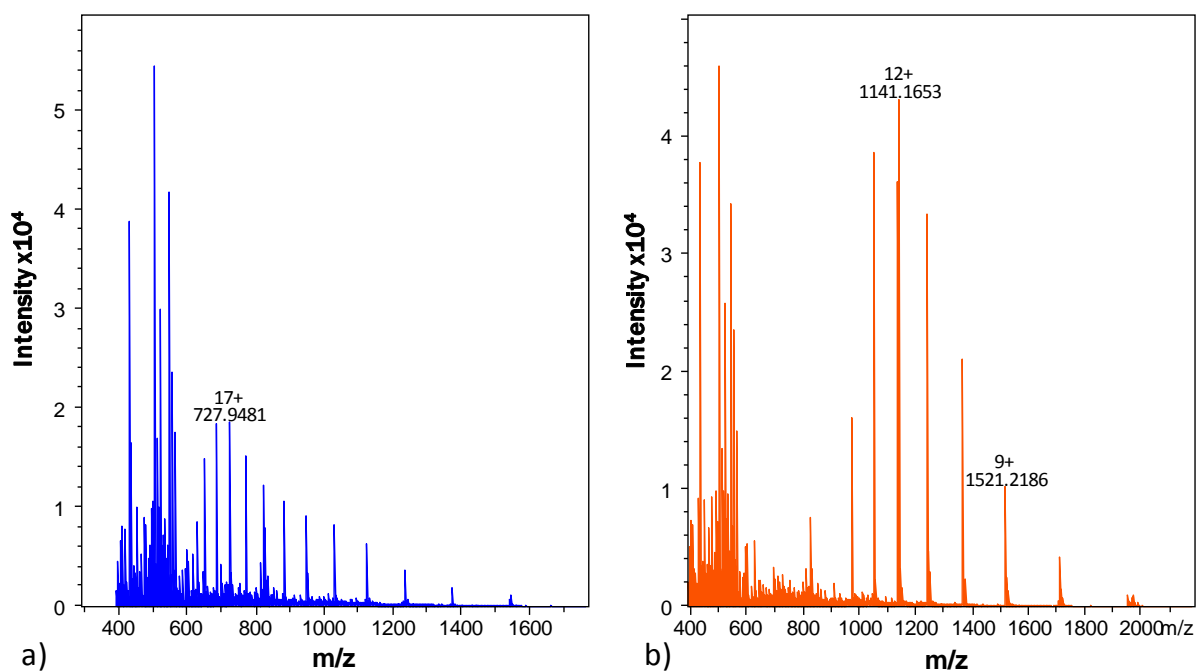

71

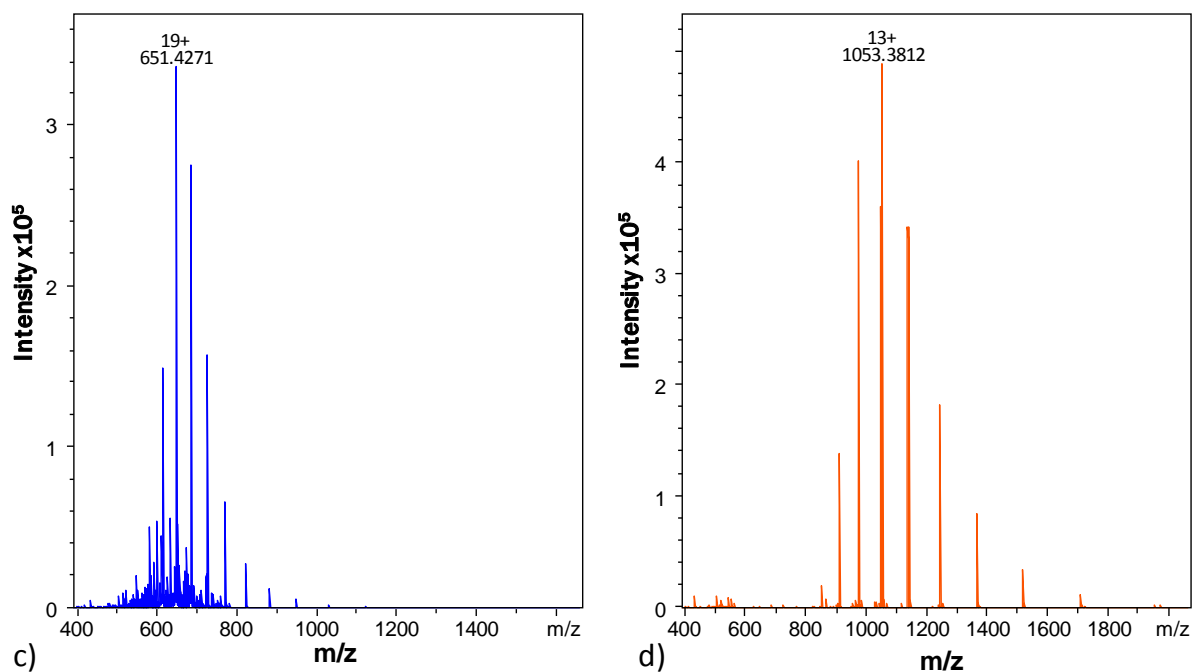

72

73 **Figure S4:** Mass spectra obtained during capillary HILIC-MS loading a mixture of  
74 cytochrome C (blue) and ribonuclease A (orange). a) and b) report the spectra at 5 ng loaded  
75 on the C4 trap column and c) and d) for 400 ng.

76

77

78

79

80

## S.4 MS spectra of Figure 5

81 Here we reported the MS spectra (Figure S5), extracted ion current chromatogram (Figure  
82 S6) as well as peak capacity calculation (Table S1) of the analysis of a mixture of protein  
83 standards using an HILIC separation method.

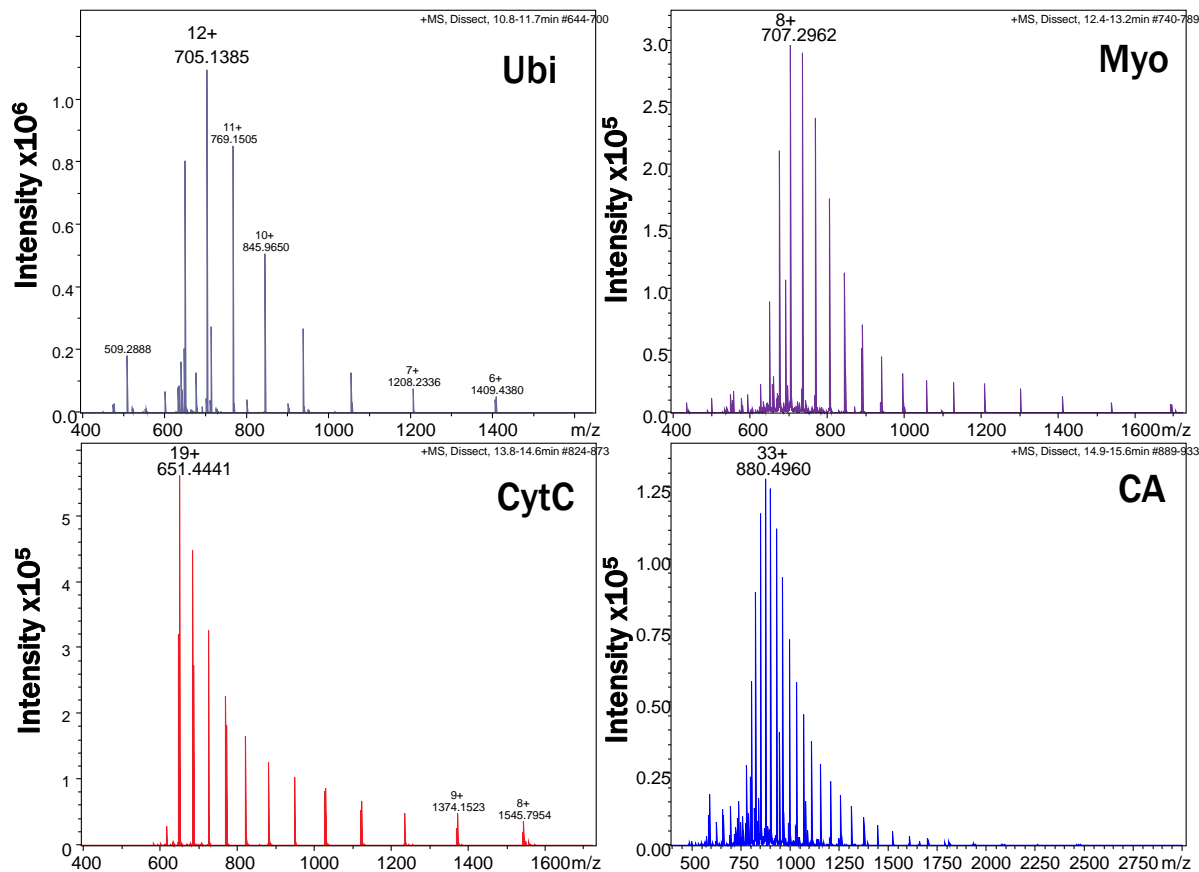

84

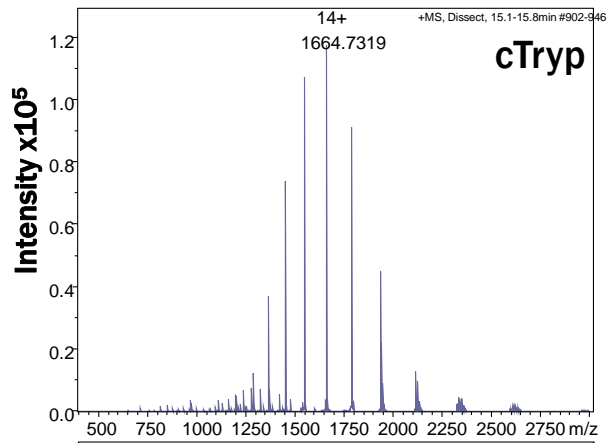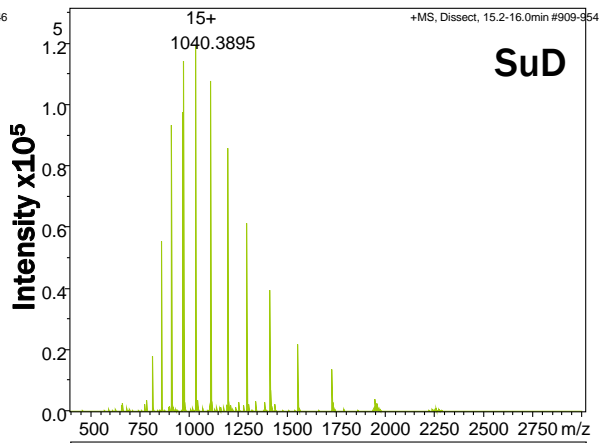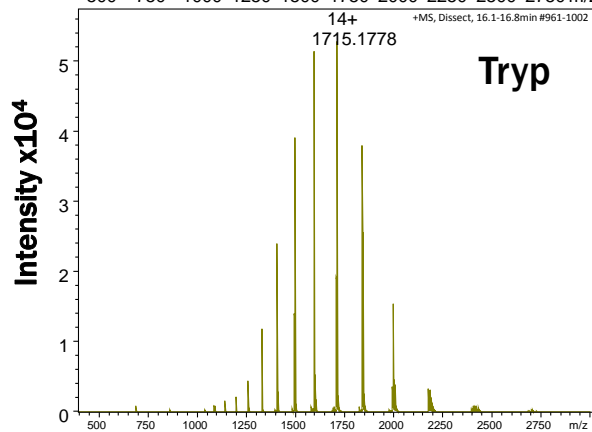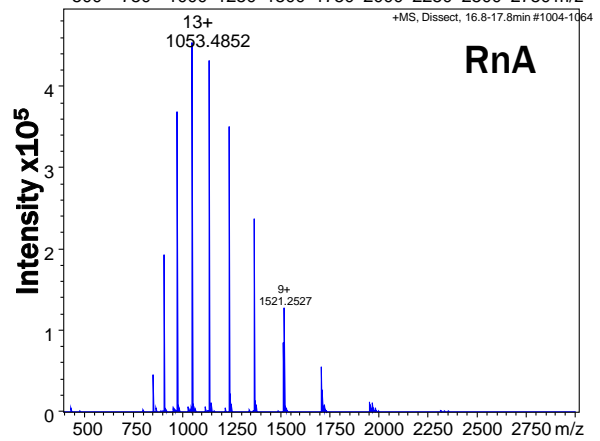

85

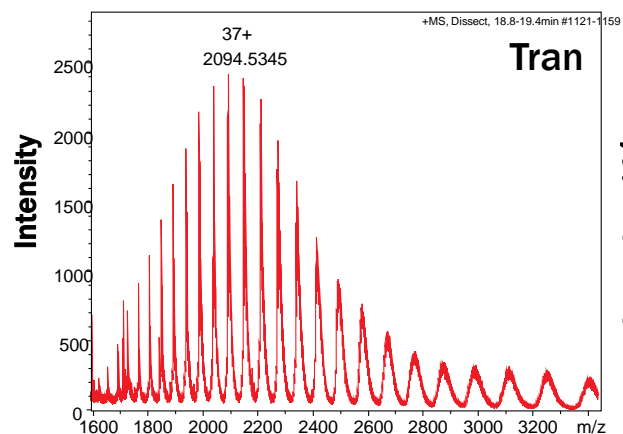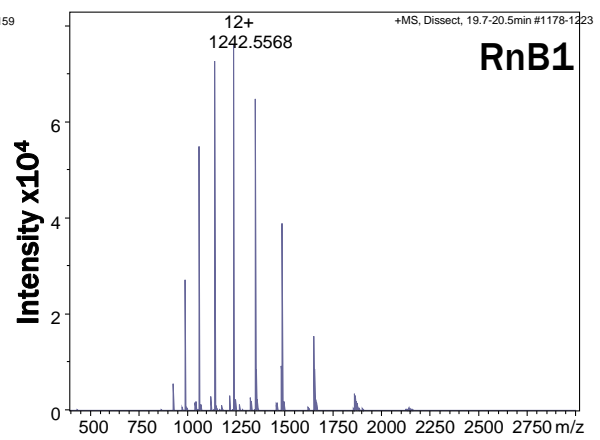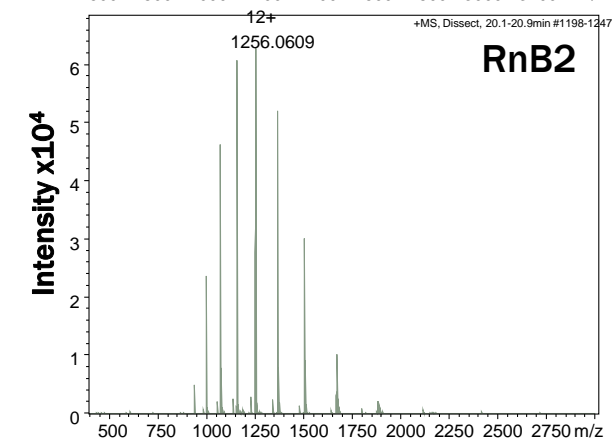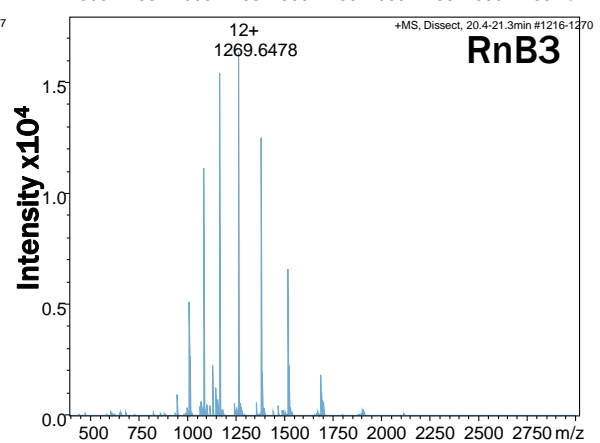

86

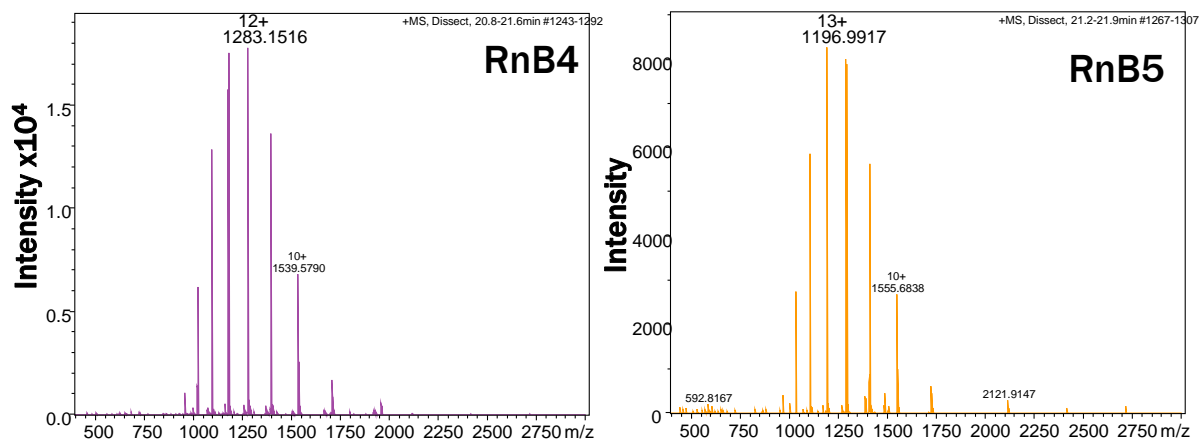

87  
 88 **Figure S5:** Mass spectra obtained during capillary HILIC-MS of a mixture of proteins. The  
 89 TIC of the separation is reported in Figure 5 of the manuscript. The experimental conditions  
 90 are reported in the experimental section of the manuscript and in Figure 5.

91  
 92

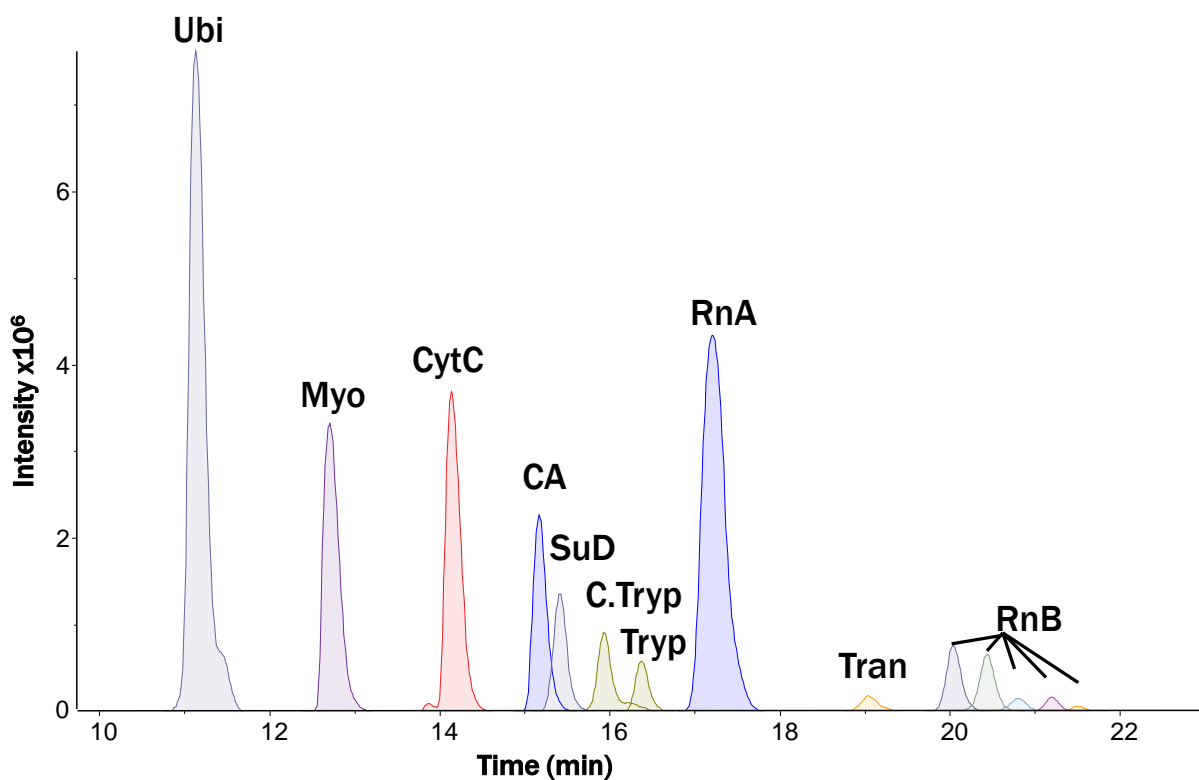

93  
 94 **Figure S6:** Extracted-ion chromatograms obtained during capillary HILIC-MS of a mixture of  
 95 proteins. The experimental conditions are reported in the experimental section of the  
 96 manuscript and in Figure 5.

97  
 98



99 **Table S1:** Retention time, peak width at half height and peak capacity for the separation of  
 100 the protein mixture reported in Figure 5 of manuscript and Figure S6.  
 101

| Protein         | RT [min] | Area    | I        | S/N   | Max. m/z  | FWHM [min] |
|-----------------|----------|---------|----------|-------|-----------|------------|
| <b>Ubi</b>      | 11.2     | 1.1E+08 | 7.57E+06 | 23697 | 705.1385  | 0.2        |
| <b>Myo</b>      | 12.7     | 4.4E+07 | 3.28E+06 | 6207  | 707.2962  | 0.2        |
| <b>CytC</b>     | 14.2     | 4.7E+07 | 3.63E+06 | 12029 | 651.4441  | 0.2        |
| <b>CA</b>       | 15.2     | 2.6E+07 | 2.25E+06 | 2583  | 880.4960  | 0.2        |
| <b>SuD</b>      | 15.4     | 1.6E+07 | 1.36E+06 | 2375  | 1664.7319 | 0.2        |
| <b>C.Tryp</b>   | 16       | 1.2E+07 | 9.08E+05 | 1034  | 1714.0359 | 0.2        |
| <b>Tryp</b>     | 16.4     | 6.7E+06 | 5.87E+05 | 1143  | 1715.1778 | 0.2        |
| <b>RnA</b>      | 17.2     | 8.5E+07 | 4.34E+06 | 9120  | 1053.4852 | 0.3        |
| <b>Tran</b>     | 19.1     | 2.8E+06 | 1.82E+05 | 53    | 2094.5345 | 0.2        |
| <b>RnB1</b>     | 20.1     | 9.7E+06 | 7.57E+05 | 1526  | 1242.5568 | 0.2        |
| <b>RnB2</b>     | 20.4     | 8.8E+06 | 6.64E+05 | 1294  | 1256.0609 | 0.2        |
| <b>RnB3</b>     | 20.8     | 2.3E+06 | 1.55E+05 | 326   | 1269.6478 | 0.2        |
| <b>RnB4</b>     | 21.2     | 2.1E+06 | 1.69E+05 | 361   | 1283.1516 | 0.2        |
| <b>RnB5</b>     | 21.5     | 7.9E+05 | 6.50E+04 | 172   | 1196.9917 | 0.2        |
| <b>Av. FWHM</b> |          |         |          |       |           | 0.21       |
| <b>nc*</b>      |          |         |          |       |           | 43.6       |

102  
 103 \* Peak Capacity ( $n_c$ ) was calculated according to  $n_c = \frac{t_G}{1.7 \cdot (w_{1/2}^h)} + 1$  using 15 min as  $t_G$  (based on the effective  
 104 elution window).  
 105

106

## S.5 HILIC- MS/MS analysis of E.coli Lysate

107 This subchapter gathers results from the HILIC-MS analysis of an E.coli Lysate (10 ug on  
108 column). Figure S7 reports TIC and dissected chromatograms, Figure S8 representative MS  
109 spectra at different time point of the LC-MS separation and table S2 the calculation used to  
110 determine the peak capacity of the separation. Figure S9 reports the protein identified  
111 performing MS/MS online (CID) and analyzing the data using TDportal

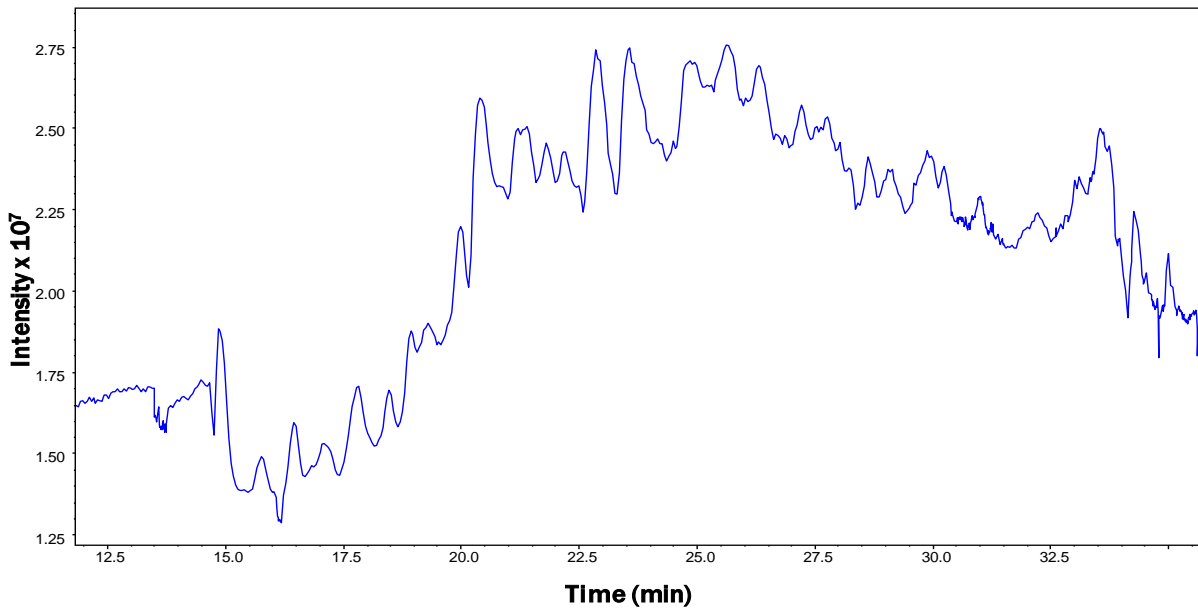

112

113 a)

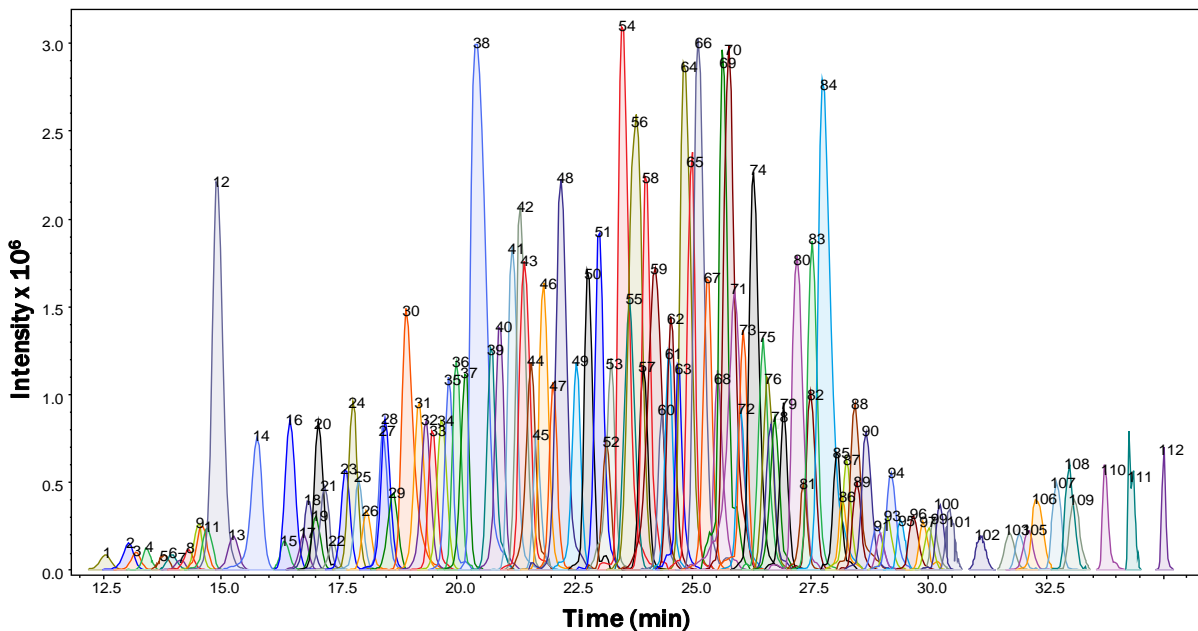

114

115 b)

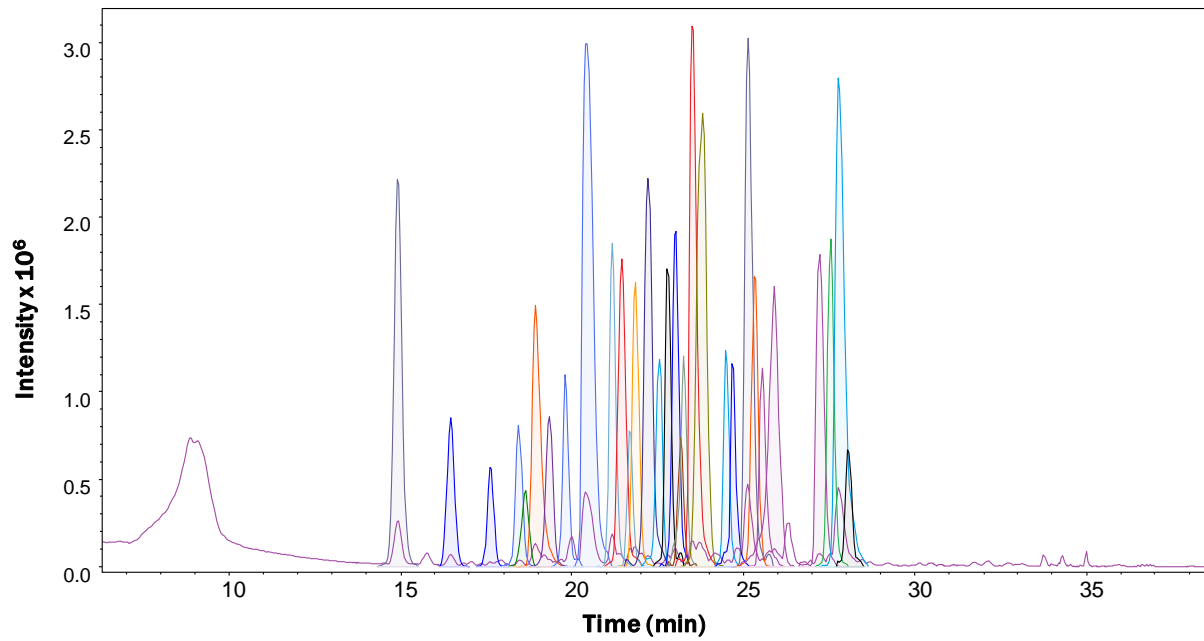

116

117 c)

118 **Figure S7:** a) Total-ion and b) Extracted-ion chromatograms of the 112 (protein)-mass  
119 features (S/N 10) obtained using the dissect mass list algorithm (Bruker Data Analysis  
120 software) and c) overlay of base peak chromatogram and extracted ion chromatogram of the  
121 28 identified proteoforms using CID and TD portal for analysis of capillary HILIC-MS/MS of  
122 an E.coli lysate. For experimental conditions see experimental section of the manuscript and  
123 Figure 6.

124

125

126

14.9-15.0 min

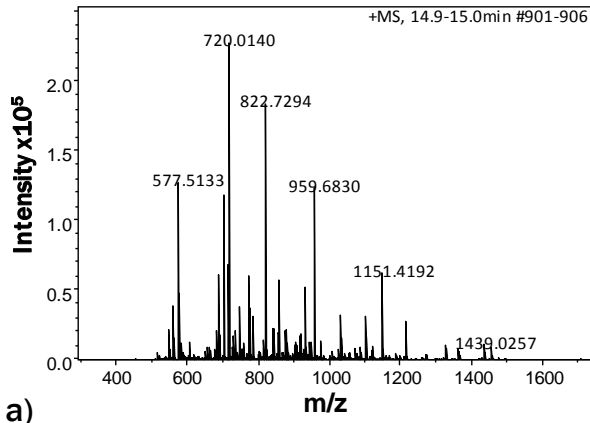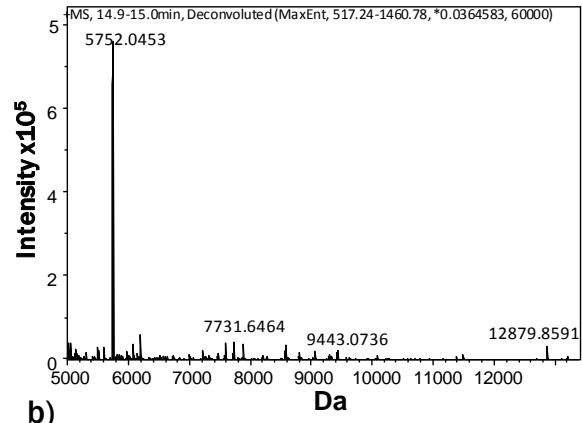

a)

b)

127

18.9-19.0 min

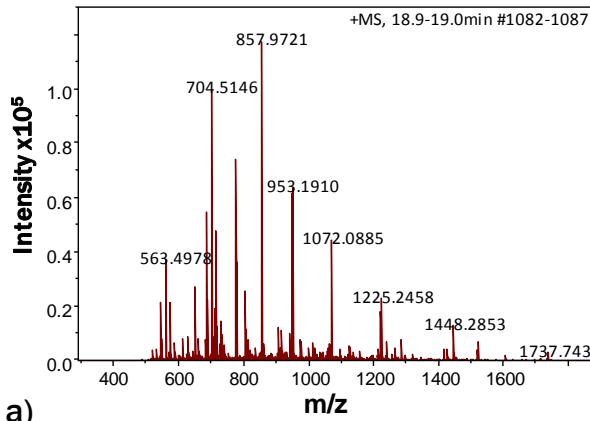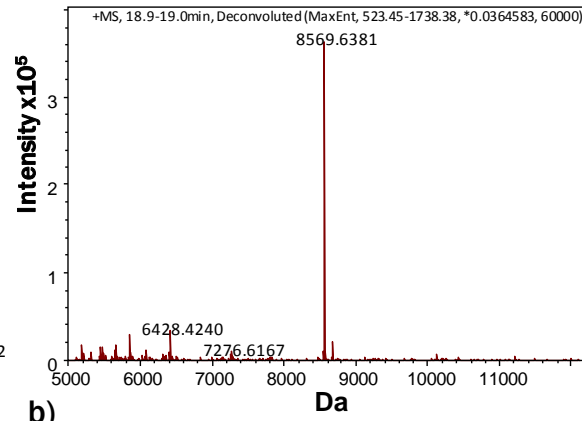

a)

b)

128

22.8-23.1 min

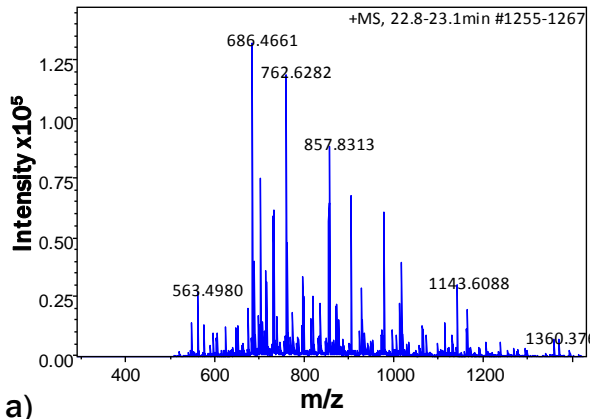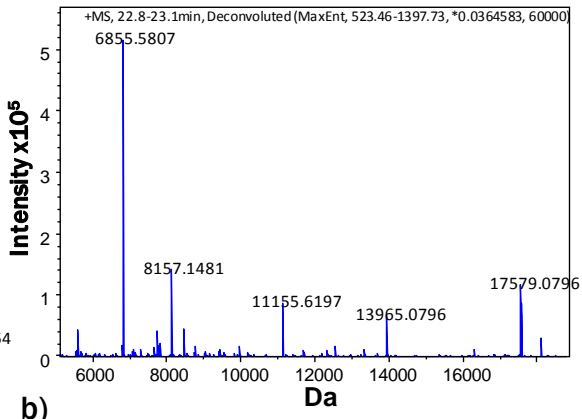

a)

b)

129

23.5-23.8 min

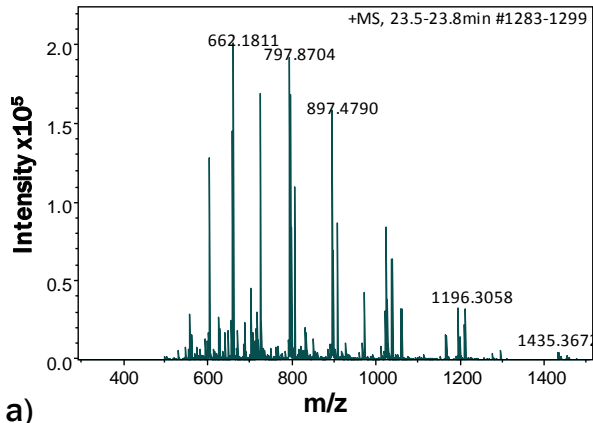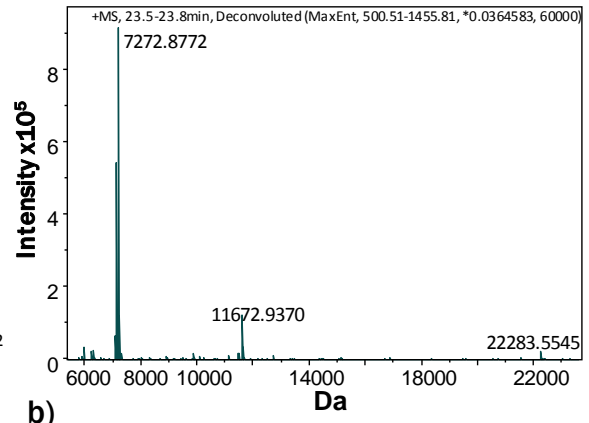

130

26.1-26.5 min

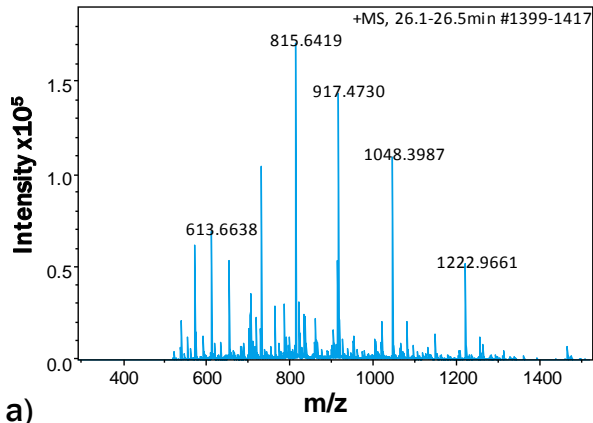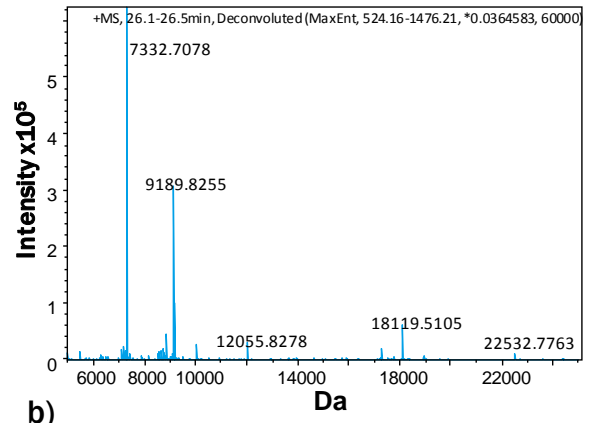

131

30.4-30.7 min

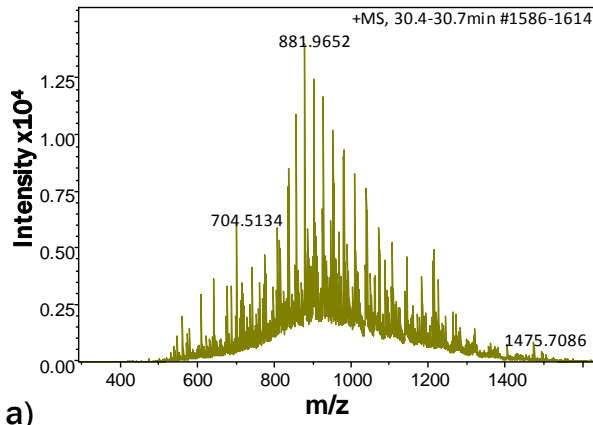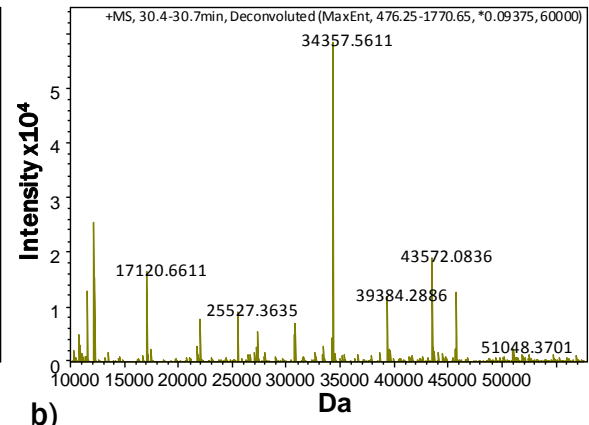

132

### 33.2-33.4 min

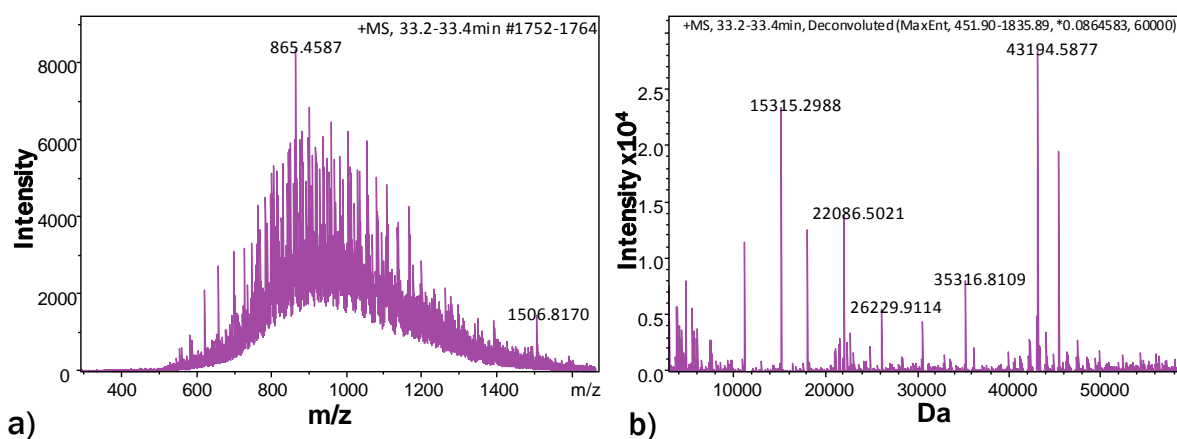

133

134 **Figure S8:** a) Mass spectra recorded in the indicated time intervals during capillary HILIC-  
135 MS of an E.coli lysate (see Figures 6 and S7). b) Deconvoluted mass spectra corresponding  
136 to mass spectra depicted in a).

137

138

139

140

141

142

143 **Table S2:** Retention time, peak area and width at half height and peak capacity for the  
 144 separation of the EColi reported in Figures 6 and S7, analyzed using the dissect algorithm  
 145 (Bruker DataAnalysis) using a S/N threshold of 10. Results from Promex analysis are  
 146 reported in a separated excel file.

|    | RT [min] | Area     | I        | S/N | Max. m/z  | FWHM [min] |
|----|----------|----------|----------|-----|-----------|------------|
| 1  | 12.6     | 1.60E+06 | 8.78E+04 | 17  | 630.85    | 0.3        |
| 2  | 13.1     | 2.47E+06 | 1.50E+05 | 40  | 577.5137  | 0.2        |
| 3  | 13.2     | 1.56E+06 | 1.02E+05 | 25  | 874.3068  | 0.2        |
| 4  | 13.5     | 1.65E+06 | 1.23E+05 | 13  | 966.1186  | 0.2        |
| 5  | 13.8     | 1.27E+06 | 7.36E+04 | 12  | 991.2663  | 0.3        |
| 6  | 14       | 1.49E+06 | 8.96E+04 | 15  | 1136.9735 | 0.3        |
| 7  | 14.2     | 9.02E+05 | 6.04E+04 | 16  | 844.1617  | 0.2        |
| 8  | 14.3     | 1.74E+06 | 1.20E+05 | 16  | 881.1343  | 0.2        |
| 9  | 14.5     | 3.72E+06 | 2.60E+05 | 28  | 577.5133  | 0.2        |
| 10 | 14.6     | 4.10E+06 | 2.49E+05 | 11  | 577.5133  | 0.2        |
| 11 | 14.7     | 3.72E+06 | 2.36E+05 | 16  | 577.5133  | 0.2        |
| 12 | 15       | 3.70E+07 | 2.20E+06 | 563 | 577.5132  | 0.3        |
| 13 | 15.3     | 3.08E+06 | 1.94E+05 | 16  | 704.5152  | 0.3        |
| 14 | 15.8     | 1.34E+07 | 7.55E+05 | 234 | 894.042   | 0.3        |
| 15 | 16.4     | 2.34E+06 | 1.58E+05 | 34  | 722.3809  | 0.2        |
| 16 | 16.5     | 1.32E+07 | 8.45E+05 | 141 | 563.4981  | 0.2        |
| 17 | 16.8     | 3.05E+06 | 2.03E+05 | 14  | 704.5154  | 0.2        |
| 18 | 16.9     | 5.85E+06 | 3.89E+05 | 46  | 805.8578  | 0.2        |
| 19 | 17       | 4.32E+06 | 3.02E+05 | 24  | 825.0143  | 0.2        |
| 20 | 17.1     | 1.13E+07 | 8.24E+05 | 44  | 563.4982  | 0.2        |
| 21 | 17.2     | 6.86E+06 | 4.71E+05 | 41  | 563.4982  | 0.2        |
| 22 | 17.4     | 2.17E+06 | 1.61E+05 | 25  | 1239.9847 | 0.2        |
| 23 | 17.7     | 8.10E+06 | 5.69E+05 | 58  | 577.5134  | 0.2        |
| 24 | 17.8     | 1.33E+07 | 9.44E+05 | 47  | 577.5134  | 0.2        |
| 25 | 18       | 7.46E+06 | 5.18E+05 | 50  | 929.1927  | 0.2        |
| 26 | 18.1     | 4.77E+06 | 3.29E+05 | 25  | 577.5134  | 0.2        |
| 27 | 18.5     | 1.15E+07 | 7.86E+05 | 52  | 857.8172  | 0.2        |
| 28 | 18.5     | 1.31E+07 | 8.52E+05 | 97  | 688.4818  | 0.2        |
| 29 | 18.7     | 6.93E+06 | 4.31E+05 | 47  | 706.754   | 0.2        |
| 30 | 19       | 2.76E+07 | 1.46E+06 | 281 | 857.9721  | 0.3        |
| 31 | 19.2     | 1.48E+07 | 9.43E+05 | 191 | 866.1252  | 0.2        |
| 32 | 19.4     | 1.34E+07 | 8.46E+05 | 181 | 889.9748  | 0.2        |
| 33 | 19.5     | 1.09E+07 | 7.83E+05 | 90  | 744.1219  | 0.2        |

|    |      |          |          |     |           |     |
|----|------|----------|----------|-----|-----------|-----|
| 34 | 19.7 | 1.27E+07 | 8.43E+05 | 141 | 563.4977  | 0.2 |
| 35 | 19.8 | 1.44E+07 | 1.07E+06 | 92  | 828.4368  | 0.2 |
| 36 | 20   | 1.63E+07 | 1.17E+06 | 185 | 940.9608  | 0.2 |
| 37 | 20.2 | 1.52E+07 | 1.11E+06 | 54  | 704.5143  | 0.2 |
| 38 | 20.5 | 6.74E+07 | 2.99E+06 | 504 | 939.8827  | 0.4 |
| 39 | 20.8 | 1.80E+07 | 1.24E+06 | 28  | 672.2585  | 0.2 |
| 40 | 20.9 | 1.93E+07 | 1.37E+06 | 35  | 672.2585  | 0.2 |
| 41 | 21.2 | 2.63E+07 | 1.82E+06 | 311 | 820.6326  | 0.2 |
| 42 | 21.4 | 3.19E+07 | 2.05E+06 | 92  | 820.6327  | 0.2 |
| 43 | 21.5 | 2.91E+07 | 1.75E+06 | 177 | 655.6571  | 0.3 |
| 44 | 21.6 | 1.81E+07 | 1.18E+06 | 53  | 578.5168  | 0.2 |
| 45 | 21.7 | 9.39E+06 | 7.64E+05 | 128 | 1010.722  | 0.2 |
| 46 | 21.9 | 2.32E+07 | 1.62E+06 | 224 | 1133.6168 | 0.2 |
| 47 | 22.1 | 1.33E+07 | 1.04E+06 | 23  | 1133.6168 | 0.2 |
| 48 | 22.2 | 3.78E+07 | 2.22E+06 | 337 | 844.7874  | 0.3 |
| 49 | 22.6 | 1.64E+07 | 1.18E+06 | 101 | 656.3504  | 0.2 |
| 50 | 22.8 | 2.24E+07 | 1.67E+06 | 81  | 857.8322  | 0.2 |
| 51 | 23   | 2.80E+07 | 1.91E+06 | 126 | 857.8322  | 0.2 |
| 52 | 23.2 | 9.16E+06 | 7.22E+05 | 84  | 991.8394  | 0.2 |
| 53 | 23.3 | 1.67E+07 | 1.17E+06 | 26  | 991.8394  | 0.2 |
| 54 | 23.5 | 5.17E+07 | 3.08E+06 | 400 | 809.1109  | 0.2 |
| 55 | 23.7 | 2.51E+07 | 1.53E+06 | 124 | 1047.8528 | 0.3 |
| 56 | 23.8 | 5.22E+07 | 2.54E+06 | 150 | 1047.8528 | 0.3 |
| 57 | 24   | 1.53E+07 | 1.15E+06 | 117 | 921.8032  | 0.2 |
| 58 | 24   | 3.09E+07 | 2.22E+06 | 26  | 563.4987  | 0.2 |
| 59 | 24.2 | 3.97E+07 | 1.70E+06 | 210 | 852.9732  | 0.3 |
| 60 | 24.4 | 1.07E+07 | 9.04E+05 | 50  | 1041.4763 | 0.2 |
| 61 | 24.5 | 1.50E+07 | 1.22E+06 | 32  | 839.4573  | 0.2 |
| 62 | 24.6 | 1.88E+07 | 1.42E+06 | 49  | 1228.597  | 0.2 |
| 63 | 24.7 | 1.46E+07 | 1.14E+06 | 99  | 918.5813  | 0.2 |
| 64 | 24.9 | 4.96E+07 | 2.85E+06 | 400 | 904.022   | 0.3 |
| 65 | 25   | 2.98E+07 | 2.31E+06 | 143 | 904.022   | 0.2 |
| 66 | 25.2 | 5.00E+07 | 2.99E+06 | 547 | 912.8745  | 0.3 |
| 67 | 25.3 | 2.43E+07 | 1.65E+06 | 117 | 857.6933  | 0.2 |
| 68 | 25.6 | 1.56E+07 | 1.08E+06 | 76  | 887.403   | 0.2 |
| 69 | 25.7 | 4.31E+07 | 2.88E+06 | 38  | 784.5971  | 0.2 |
| 70 | 25.8 | 5.24E+07 | 2.95E+06 | 107 | 936.2339  | 0.3 |
| 71 | 25.9 | 3.63E+07 | 1.59E+06 | 117 | 887.4035  | 0.3 |



|     |      |          |          |     |           |     |
|-----|------|----------|----------|-----|-----------|-----|
| 72  | 26.1 | 1.21E+07 | 9.06E+05 | 50  | 784.5971  | 0.2 |
| 73  | 26.1 | 1.80E+07 | 1.35E+06 | 112 | 802.4307  | 0.2 |
| 74  | 26.3 | 3.51E+07 | 2.26E+06 | 361 | 815.6419  | 0.2 |
| 75  | 26.5 | 2.04E+07 | 1.31E+06 | 37  | 766.8293  | 0.2 |
| 76  | 26.6 | 1.71E+07 | 1.08E+06 | 40  | 577.5139  | 0.2 |
| 77  | 26.7 | 1.20E+07 | 8.23E+05 | 20  | 577.5139  | 0.2 |
| 78  | 26.8 | 1.32E+07 | 8.61E+05 | 33  | 923.8084  | 0.2 |
| 79  | 27   | 1.12E+07 | 9.39E+05 | 41  | 783.2922  | 0.2 |
| 80  | 27.2 | 2.94E+07 | 1.75E+06 | 184 | 636.6124  | 0.3 |
| 81  | 27.4 | 6.20E+06 | 4.83E+05 | 22  | 954.5173  | 0.2 |
| 82  | 27.5 | 1.37E+07 | 9.90E+05 | 41  | 923.8079  | 0.2 |
| 83  | 27.6 | 2.75E+07 | 1.87E+06 | 92  | 843.7888  | 0.2 |
| 84  | 27.8 | 5.48E+07 | 2.75E+06 | 510 | 909.8408  | 0.3 |
| 85  | 28.1 | 9.27E+06 | 6.60E+05 | 23  | 824.9659  | 0.2 |
| 86  | 28.2 | 5.61E+06 | 4.08E+05 | 18  | 798.7695  | 0.2 |
| 87  | 28.3 | 8.42E+06 | 6.19E+05 | 39  | 1061.5579 | 0.2 |
| 88  | 28.5 | 1.58E+07 | 9.35E+05 | 50  | 980.8937  | 0.2 |
| 89  | 28.5 | 6.71E+06 | 4.97E+05 | 24  | 871.2022  | 0.2 |
| 90  | 28.7 | 1.24E+07 | 7.86E+05 | 58  | 851.95    | 0.2 |
| 91  | 28.9 | 4.12E+06 | 2.47E+05 | 22  | 983.9128  | 0.3 |
| 92  | 29   | 2.66E+06 | 2.11E+05 | 14  | 608.5286  | 0.2 |
| 93  | 29.2 | 4.38E+06 | 2.97E+05 | 18  | 765.7498  | 0.2 |
| 94  | 29.2 | 8.89E+06 | 5.46E+05 | 44  | 653.0486  | 0.3 |
| 95  | 29.5 | 3.50E+06 | 2.72E+05 | 17  | 885.0077  | 0.2 |
| 96  | 29.7 | 4.57E+06 | 3.11E+05 | 26  | 564.502   | 0.2 |
| 97  | 29.9 | 3.89E+06 | 2.65E+05 | 19  | 577.5137  | 0.2 |
| 98  | 30   | 3.43E+06 | 2.36E+05 | 19  | 549.4832  | 0.2 |
| 99  | 30.1 | 3.38E+06 | 2.81E+05 | 29  | 902.1686  | 0.2 |
| 100 | 30.3 | 4.55E+06 | 3.71E+05 | 24  | 751.215   | 0.2 |
| 101 | 30.5 | 4.29E+06 | 2.67E+05 | 32  | 881.9657  | 0.1 |
| 102 | 31.1 | 2.75E+06 | 1.94E+05 | 23  | 859.4501  | 0.2 |
| 103 | 31.7 | 3.45E+06 | 2.20E+05 | 50  | 780.5398  | 0.2 |
| 104 | 31.9 | 2.74E+06 | 1.99E+05 | 12  | 1303.0196 | 0.2 |
| 105 | 32.1 | 3.46E+06 | 2.22E+05 | 41  | 1007.9323 | 0.2 |
| 106 | 32.3 | 6.92E+06 | 3.94E+05 | 14  | 549.4842  | 0.3 |
| 107 | 32.7 | 6.93E+06 | 4.88E+05 | 44  | 898.9514  | 0.2 |
| 108 | 33   | 7.99E+06 | 5.94E+05 | 17  | 844.9189  | 0.2 |
| 109 | 33.1 | 6.36E+06 | 3.91E+05 | 24  | 865.4195  | 0.3 |

|     |      |          |          |     |                 |        |
|-----|------|----------|----------|-----|-----------------|--------|
| 110 | 33.8 | 5.37E+06 | 5.61E+05 | 82  | 974.7796        | 0.1    |
| 111 | 34.3 | 6.21E+06 | 5.22E+05 | 27  | 1073.4674       | 0.2    |
| 112 | 35   | 4.25E+06 | 6.76E+05 | 106 | 1053.4034       | 0.1    |
| 113 | 35.9 | 6.00E+05 | 5.98E+04 | 18  | 650.2339        | 0.2    |
|     |      |          |          |     | <b>Av. FWHM</b> | 0.219  |
|     |      |          |          |     | <b>nc*</b>      | 195.43 |

147

148 \* Peak Capacity ( $n_c$ ) was calculated according to  $n_c = \frac{t_G}{1.7 \cdot (\overline{w}_{1/2}^h)} + 1$  using 25 min as  $t_G$  (based on the effective

149 elution window).
